# Supplementary material for: Anion deficiency motivated Na2V6O16 nanobelts for superior sustainable zinc ion storage
Source: Royal Society of Chemistry journal article supplement (doi:10.1039/d1ta05397c), 2021-01-01
Supplement: d1ta05397c1.pdf [file d1ta05397c1.pdf]

## Electronic Supplementary Information

### **Anion Deficiency Motivated Na<sub>2</sub>V<sub>6</sub>O<sub>16</sub> Nanobelts for Superior Sustainable Zinc Ion Storage**

*Xiaojing Liu, †<sup>a</sup> Xinyue Hu, †<sup>a</sup> Shuang Hou, <sup>a</sup> Wei He, <sup>a</sup> Zhifu Liang, <sup>a</sup> Lingyu Meng, <sup>a</sup> Qing Guo, <sup>a</sup> Tiezhong Liu<sup>a</sup>, Qiang, Ru<sup>\*b</sup> and Lingzhi Zhao<sup>\*a, c, d</sup>*

<sup>a</sup> Guangdong Provincial Engineering Technology Research Center for Low Carbon and Advanced Energy Materials, Institute of Semiconductor Science and Technology, South China Normal University, Guangzhou 510631, China

<sup>b</sup> Guangdong Provincial Key Laboratory of Quantum Engineering and Quantum Materials, Guangdong Engineering Technology Research Center of Efficient Green, Energy and Environment Protection Materials, School of Physics and Telecommunication Engineering, South China Normal University, Guangzhou 510006, China

<sup>c</sup> Institute of Science and Technology Innovation (Qingyuan), South China Normal University, Guangzhou 510631, China

<sup>d</sup> SCNU Qingyuan Institute of Science and Technology Innovation Co., Ltd., Qingyuan, 511517, China

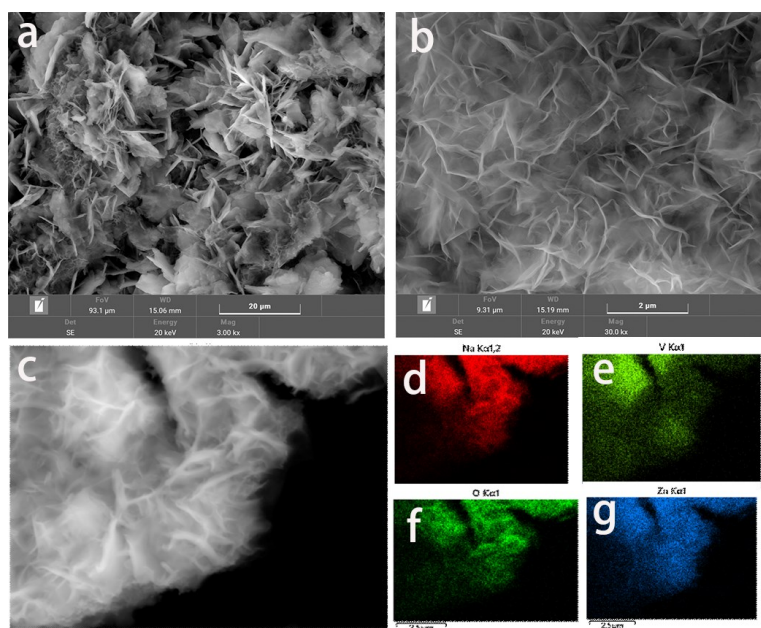

**Fig. S1** Morphology and composition of cycled ANVO. SEM images of the ANVO cathode (a), (b) after 10,000 cycles at 10 A g<sup>-1</sup>. (c) SEM image and corresponding EDX mappings of (d) Na, (e) V, (f) O, (g) Zn.

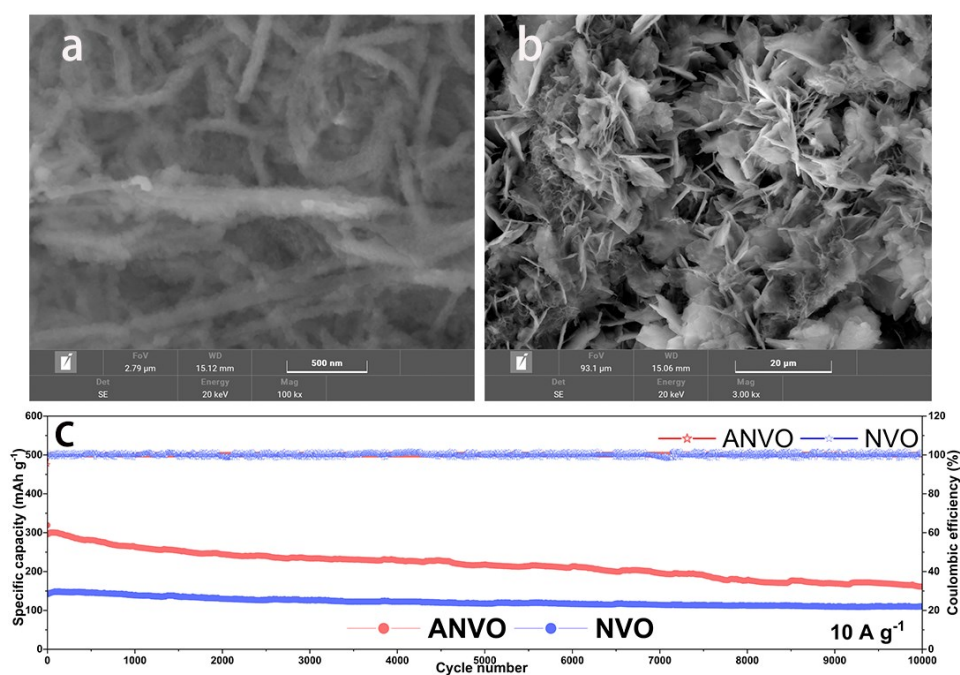

**Fig. S2** the SEM of (a-b) ANVO electrodes at the initial state and after 10,000 cycles. (c) Cyclic performance of ANVO and NVO at a current density of 10 A g<sup>-1</sup>.
